# Supplementary material
Source: PubMed Central journal article supplement (PMC6580969)
Supplement: JVI.02244-18-s0002.pdf [file JVI.02244-18-s0002.pdf]

**Movie S1:** Three-dimensional reconstruction of HCMV capsid budding into a large cellular vesicle derived from STEM-tomography data. Green: vesicle membrane and forming viral envelope, orange: capsid, blue: tegument. light blue: cross section through tegument.
